# Supplementary material for: A DFT-D study on the interaction between lactic acid and single-wall carbon nanotubes
Source: Royal Society of Chemistry journal article supplement (doi:10.1039/c5ra19949b), 2015-01-01
Supplement: c5ra19949b1.pdf [file c5ra19949b1.pdf]

## Supporting Information

### **A DFT-D study on the interaction between lactic acid and single-wall carbon nanotubes**

Alireza Najafi Chermahini\*<sup>a</sup>, Abbas Teimouri <sup>b</sup>, Hossein Farrokhpour <sup>a</sup>

<sup>a</sup> Department of Chemistry, Isfahan University of Technology, 84154-83111 Isfahan, Iran, e-mail: [anajafi@cc.iut.ac.ir](mailto:anajafi@cc.iut.ac.ir) or [najafy@gmail.com](mailto:najafy@gmail.com)

<sup>b</sup> Chemistry Department, Payame Noor University (PNU), Tehran 19395-4697, Iran

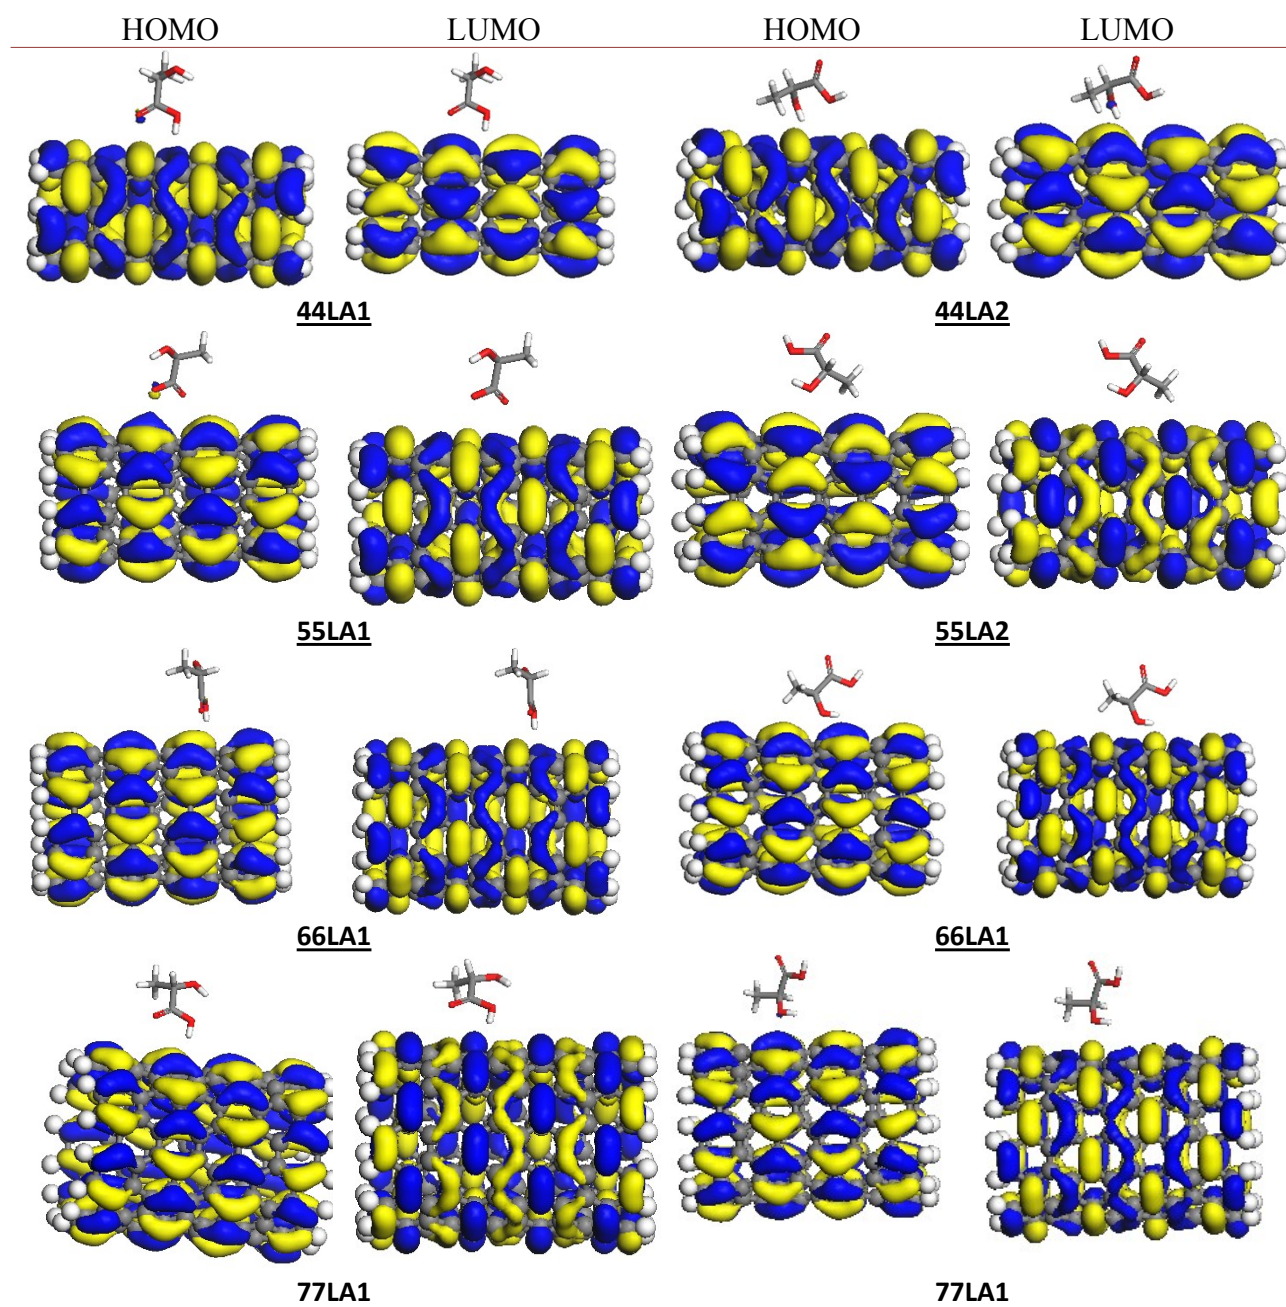

**Fig. S1** Profiles of the highest occupied molecular orbital (HOMO) and the lowest unoccupied molecular orbital (LUMO) for SWCNTs modified with lactic acid at DFT-D level of theory. The isovalue is taken as 0.03 au.

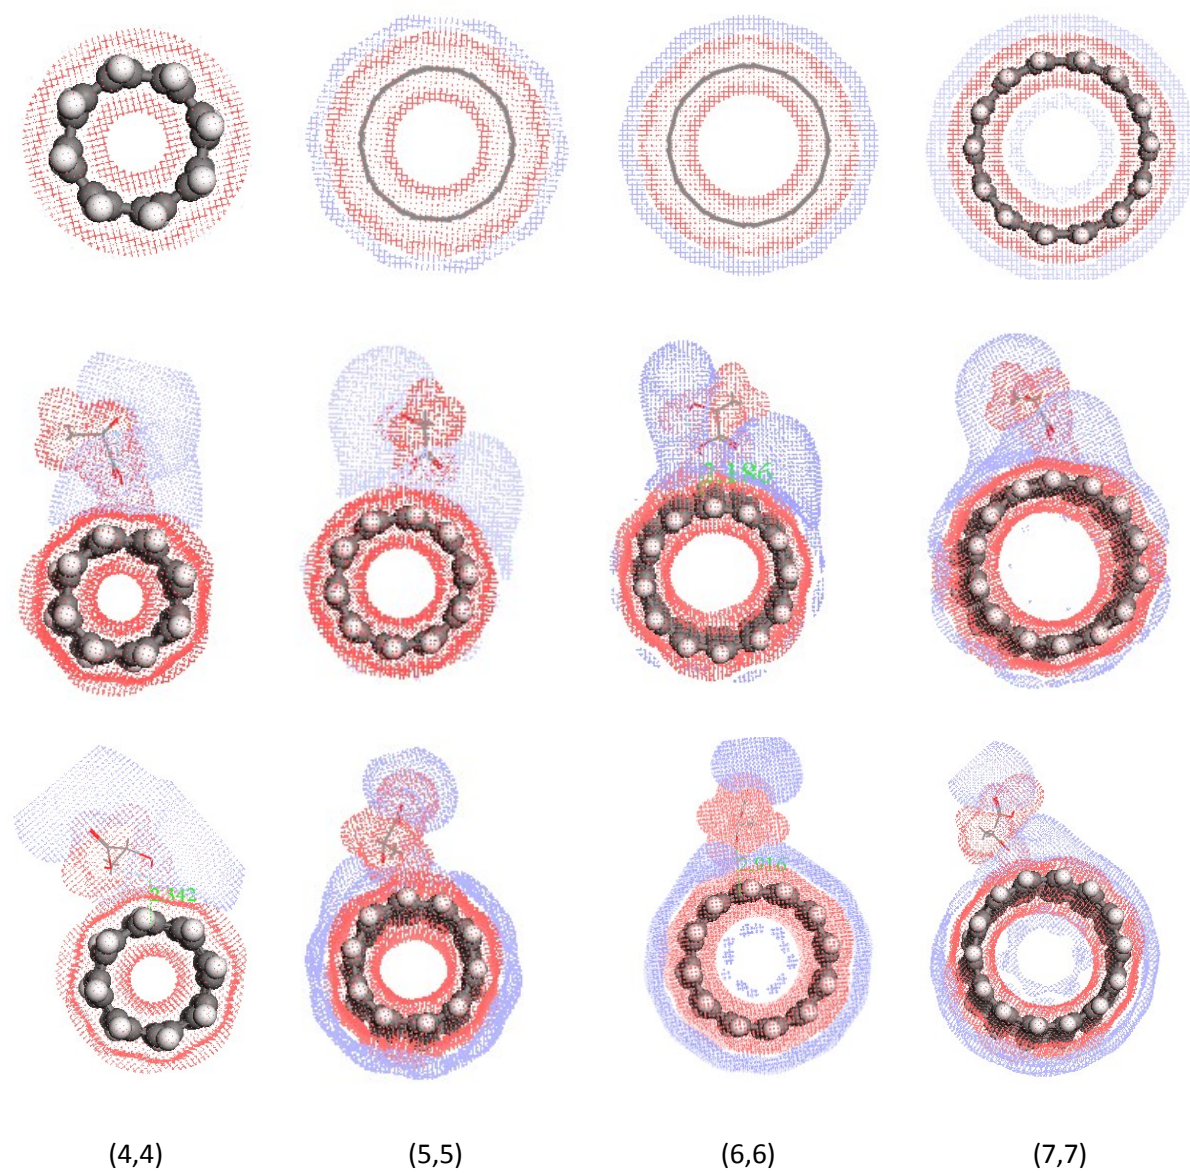

**Fig. S2** MEP surfaces for the systems first row include SWCNTs, middle row show CNT complexes with LA in mode 1 and bottom row show CNT complexes with LA in mode 2. In the figure the blue color indicates the negative charge zone and the red color the positive charge zone, (red color with an isovalue = 0.04 au) and higher negative charge, (blue color with an isovalue = -0.03 au)
